# Supplementary material for: Determination of 21-hydroxylase autoantibodies: inter-laboratory concordance in the Euradrenal International Serum Exchange Program
Source: publisher site journal article supplement (doi:10.1515/cclm-2014-1106), 2015-01-01
Supplement: Supplementary file 1 [file cclm-2014-1106_Supple_Table.docx]

| **Supplementary Table** - Triplicate ranks of 9 serum samples obtained in each laboratory | | | | | | | | | | | | | | | | |  |  |  |  |  |  |  |  |  |  |  |  |
| --- | --- | --- | --- | --- | --- | --- | --- | --- | --- | --- | --- | --- | --- | --- | --- | --- | --- | --- | --- | --- | --- | --- | --- | --- | --- | --- | --- | --- |
|  |  | Serum sample codes | | | | | | | | | | | | | | | | | | | | | | | | | | |
| **LAB ID** | | NO42 | | | NO173 | | | NO356 | | | NO470 | | | NO725 | | | NO796 | | | PD43 | | | PD45 | | | PD63 | | |
| “in house” assays | **AA** | 74 | 84 | 63 | 82 | 68 | 75 | 83 | 107 | 71 | 111 | 110 | 99 | 67 | 69 | 62 | 86 | 90 | 73 | 109 | 116 | 105 | 57 | 55 | 56 | 119 | 120 | 114 |
| **EH** | 89 | 71 | 79 | 75 | 74 | 84 | 81 | 73 | 102 | 118 | 105 | 114 | 58 | 63 | 44 | 86 | 96 | 80 | 99 | 101 | 87 | 57 | 56 | 37 | 119 | 120 | 113 |
| **EV** | 77 | 79 | 81 | 72 | 75 | 73 | 92 | 91 | 93 | 109 | 111 | 108 | 64 | 67 | 66 | 80 | 70 | 76 | 102 | 103 | 104 | 60 | 57 | 59 | 118 | 120 | 119 |
| **GR** | 82 | 74 | 77 | 72 | 70 | 68 | 104 | 103 | 101 | 112 | 115 | 106 | 55 | 63 | 43 | 85 | 80 | 75 | 98 | 94 | 95 | 38 | 34 | 83 | 117 | 120 | 119 |
| **ID** | 104 | 117 | 65 | 8 | 34 | 53 | 110 | 1 | 115 | 30 | 64 | 17 | 56 | 116 | 21 | 106 | 31 | 44 | 113 | 108 | 102 | 59 | 27 | 23 | 93 | 119 | 76 |
| **IL** | 75 | 74 | 78 | 72 | 69 | 70 | 87 | 92 | 86 | 120 | 119 | 115 | 20 | 61 | 60 | 91 | 73 | 89 | 114 | 111 | 109 | 62 | 63 | 18 | 117 | 106 | 97 |
| **SS** | 85 | 78 | 77 | 71 | 72 | 74 | 83 | 89 | 87 | 113 | 114 | 111 | 65 | 46 | 56 | 80 | 73 | 76 | 101 | 100 | 99 | 63 | 62 | 60 | 120 | 117 | 119 |
| **TA** | 91 | 72 | 64 | 78 | 69 | 70 | 85 | 80 | 79 | 99 | 100 | 106 | 67 | 73 | 52 | 109 | 92 | 75 | 86 | 111 | 112 | 65 | 58 | 51 | 120 | 119 | 110 |
| **WI** | 75 | 80 | 79 | 69 | 72 | 74 | 88 | 94 | 99 | 109 | 110 | 113 | 62 | 66 | 61 | 76 | 77 | 78 | 102 | 96 | 104 | 57 | 58 | 60 | 120 | 118 | 119 |
| commercial kit | **ED** | 74 | 76 | 77 | 66 | 68 | 69 | 96 | 97 | 95 | 110 | 111 | 112 | 61 | 60 | 58 | 78 | 80 | 79 | 99 | 101 | 98 | 50 | 52 | 54 | 118 | 119 | 120 |
| **GH** | 73 | 80 | 75 | 62 | 68 | 56 | 102 | 98 | 100 | 112 | 107 | 113 | 6 | 64 | 57 | 88 | 74 | 79 | 90 | 95 | 96 | 20 | 22 | 1 | 119 | 118 | 120 |
| **IN** | 79 | 74 | 80 | 70 | 64 | 69 | 54 | 102 | 104 | 111 | 113 | 114 | 51 | 61 | 62 | 76 | 75 | 82 | 101 | 93 | 95 | 35 | 2 | 11 | 119 | 118 | 120 |
| **NI** | 54 | 83 | 111 | 102 | 117 | 62 | 95 | 31 | 82 | 27 | 75 | 44 | 100 | 79 | 65 | 60 | 24 | 112 | 92 | 68 | 114 | 34 | 87 | 80 | 91 | 20 | 72 |
| **ON** | 81 | 76 | 77 | 71 | 62 | 67 | 100 | 104 | 103 | 110 | 113 | 111 | 61 | 58 | 30 | 78 | 74 | 73 | 101 | 94 | 93 | 22 | 33 | 37 | 120 | 119 | 116 |
